# Supplementary material
Source: PubMed Central journal article supplement (PMC5710344)
Supplement: jamapediatr-171-622-s002.pdf [file jamapediatr-171-622-s002.pdf]

## Supplementary Online Content

Boutelle KN, Rhee KE, Liang J, et al. Effect of attendance of the child on body weight, energy intake, and physical activity in childhood obesity treatment: a randomized clinical trial. *JAMA Pediatr*. Published online May 30, 2017. doi:10.1001/jamapediatrics.2017.0651

**eTable.** Child and Parent Mean Scores on Outcome Measures for Parent-Based Treatment and Family-Based Treatment at Baseline, 6-,12- and 24-Month Follow-up

This supplementary material has been provided by the authors to give readers additional information about their work.

**eTable 1. Child and parent mean scores on outcome measures for Parent-Based Treatment and Family-Based Treatment at baseline, 6-,12- and 24-month follow-up**

|                                               |               | Parent Based Treatment |          |        |          | Family Based Treatment |          |        |          |
|-----------------------------------------------|---------------|------------------------|----------|--------|----------|------------------------|----------|--------|----------|
|                                               |               | Baseline               | 6 m      | 12 m   | 24 m     | Baseline               | 6 m      | 12 m   | 24 m     |
| <b>Body Mass Index (BMI)</b>                  |               |                        |          |        |          |                        |          |        |          |
|                                               | <b>Child</b>  | 2.02                   | 1.73     | 1.82   | 1.81     | 1.98                   | 1.73     | 1.77   | 1.82     |
|                                               |               | (0.36)                 | (0.49)   | (0.49) | (0.52)   | (0.32)                 | (0.41)   | (0.44) | (0.40)   |
|                                               | <b>Parent</b> | 32.11                  | 31.06    | 31.77  | 32.95    | 31.70                  | 30.15    | 30.48  | 30.90    |
|                                               |               | (6.11)                 | (6.43)   | (6.54) | (7.07)   | (6.53)                 | (6.18)   | (5.94) | (6.17)   |
| <b>Moderate to Vigorous Physical Activity</b> |               |                        |          |        |          |                        |          |        |          |
|                                               | <b>Child</b>  | 181.16                 | 167.05   | --     | 151.78   | 182.32                 | 164.50   | --     | 147.43   |
|                                               |               | (49.66)                | (59.86)  | --     | (47.67)  | (38.72)                | (42.36)  | --     | (45.61)  |
|                                               | <b>Parent</b> | 33.37                  | 32.00    | --     | 31.40    | 31.72                  | 26.75    | --     | 30.81    |
|                                               |               | (21.50)                | (20.41)  | --     | (18.23)  | (20.70)                | (16.62)  | --     | (19.64)  |
| <b>Dietary Recall: Total Energy</b>           |               |                        |          |        |          |                        |          |        |          |
|                                               | <b>Child</b>  | 1744.77                | 1436.91  | --     | 1608.83  | 1680.28                | 1447.19  | --     | 1568.92  |
|                                               |               | (430.08)               | (351.65) | --     | (377.69) | (388.10)               | (281.53) | --     | (353.16) |
|                                               | <b>Parent</b> | 1725.99                | 1391.38  | --     | 1544.01  | 1685.23                | 1427.14  | --     | 1472.14  |
|                                               |               | (541.70)               | (326.00) | --     | (294.07) | (493.41)               | (409.00) | --     | (396.36) |
| <b>CBPRI:Acceptance</b>                       |               |                        |          |        |          |                        |          |        |          |
|                                               | <b>Mom</b>    | 2.58                   | 2.53     | 2.56   | 2.60     | 2.58                   | 2.70     | 2.65   | 2.66     |
|                                               |               | (0.36)                 | (0.46)   | (0.47) | (0.48)   | (0.41)                 | (0.33)   | (0.43) | (0.38)   |
|                                               | <b>Dad</b>    | 2.45                   | 2.48     | 2.49   | 2.42     | 2.47                   | 2.62     | 2.60   | 2.54     |
|                                               |               | (0.45)                 | (0.52)   | (0.49) | (0.59)   | (0.50)                 | (0.39)   | (0.45) | (0.51)   |
| <b>CBPRI:Autonomy</b>                         |               |                        |          |        |          |                        |          |        |          |
|                                               | <b>Mom</b>    | 1.64                   | 1.72     | 1.68   | 1.62     | 1.68                   | 1.78     | 1.73   | 1.69     |
|                                               |               | (0.49)                 | (0.56)   | (0.54) | (0.51)   | (0.51)                 | (0.58)   | (0.59) | (0.60)   |
|                                               | <b>Dad</b>    | 1.53                   | 1.50     | 1.54   | 1.55     | 1.66                   | 1.78     | 1.79   | 1.68     |

|                                    |                        |        |        |        |        |        |        |        |        |
|------------------------------------|------------------------|--------|--------|--------|--------|--------|--------|--------|--------|
|                                    |                        | (0.47) | (0.58) | (0.61) | (0.60) | (0.57) | (0.62) | (0.64) | (0.58) |
| <b>CBPRI: Control</b>              |                        |        |        |        |        |        |        |        |        |
|                                    | <b>Mom</b>             | 1.51   | 1.53   | 1.56   | 1.54   | 1.54   | 1.64   | 1.66   | 1.62   |
|                                    |                        | (0.36) | (0.46) | (0.41) | (0.35) | (0.39) | (0.49) | (0.48) | (0.51) |
|                                    | <b>Dad</b>             | 1.53   | 1.59   | 1.62   | 1.57   | 1.49   | 1.70   | 1.72   | 1.64   |
|                                    |                        | (0.41) | (0.55) | (0.52) | (0.46) | (0.46) | (0.56) | (0.56) | (0.55) |
| <b>Birch Feeding Questionnaire</b> |                        |        |        |        |        |        |        |        |        |
|                                    | <b>Responsible</b>     | 3.84   | 3.85   | 3.66   | 3.73   | 3.84   | 3.96   | 3.88   | 3.71   |
|                                    |                        | (0.77) | (0.84) | (0.80) | (0.83) | (0.77) | (0.67) | (0.73) | (0.76) |
|                                    | <b>Pressure to Eat</b> | 1.59   | 1.52   | 1.45   | 1.55   | 1.57   | 1.54   | 1.43   | 1.61   |
|                                    |                        | (0.67) | (0.64) | (0.68) | (0.66) | (0.71) | (0.62) | (0.64) | (0.92) |
|                                    | <b>Restriction</b>     | 3.92   | 3.59   | 3.62   | 3.47   | 3.84   | 3.58   | 3.50   | 3.43   |
|                                    |                        | (0.56) | (0.79) | (0.75) | (0.76) | (0.60) | (0.69) | (0.72) | (0.92) |
|                                    | <b>Monitoring</b>      | 3.62   | 4.05   | 3.81   | 3.62   | 3.62   | 4.01   | 3.90   | 3.63   |
|                                    |                        | (0.93) | (0.86) | (0.80) | (0.88) | (0.83) | (0.68) | (0.92) | (1.02) |
